# Supplementary material for: SDG5 ‘Gender Equality’ and the COVID-19 pandemic: a rapid assessment of health system responses in selected upper-middle and high-income countries
Source: bioRxiv or medRxiv preprint supplement (doi:10.1101/2022.09.09.22279765), 2022-09-15
Supplement: Supplementary file [file media-1.pdf]

**Appendix Table 1.1 Australia, country case study summary**

| <b>SDG5</b>                                        | <b>Impact</b>                                                                                                                                                                                                                                               | <b>Action</b>                                                                                                                                                                                             | <b>Future Policy</b>                                                                            |
|----------------------------------------------------|-------------------------------------------------------------------------------------------------------------------------------------------------------------------------------------------------------------------------------------------------------------|-----------------------------------------------------------------------------------------------------------------------------------------------------------------------------------------------------------|-------------------------------------------------------------------------------------------------|
| <b>Maternity care/<br/>reproductive<br/>health</b> |                                                                                                                                                                                                                                                             |                                                                                                                                                                                                           |                                                                                                 |
| Summary                                            | essential services were kept open with some limitations and new digital services; restrictions to prevention and support services; evidence of increased rates of antenatal depression; some improvement in reproductive health services and rights         | overall little attention but some expansion of reproductive health services, including early abortion; new digital antenatal services are included in Medicare Benefits Schedule (MBS)                    | some antenatal expansions maintained; currently no decision on reproductive services and rights |
| Maternity care                                     | access to essential services, but restrictions due to pandemic policies (face mask during birthing; no access of partners; etc.) with strong local variation; new digital services and strong expansion; restrictions in support and non-essential services | new digital antenatal services were added to healthcare delivery, covered by the MBS                                                                                                                      | New digital antenatal services included in the MBS                                              |
| Reproductive services                              | essential services were kept open but pandemic restrictions on elective surgery included fertility treatments; some variation; early medical abortion was made available via digital consultation; choice of provider for reproductive health consultations | early medical abortion via digital appointments was introduced in the MBS; digital provision of reproductive health consultations was reimbursed by MBS and restriction to choice of provider was relaxed | currently no decision                                                                           |
| Reproductive rights                                | some improvement through relaxed legal restrictions of early abortion and through improved MBS rules on choice of provider                                                                                                                                  | no legal action but some improvements through changes in the MBS scheme                                                                                                                                   | currently no decision                                                                           |
| Care for pregnant women/<br>vaccination            | included in vaccination programs                                                                                                                                                                                                                            | since June 2021, pregnant women are included in prioritised groups                                                                                                                                        | none                                                                                            |
| Health labour market and employment                | higher infection risk of midwives and other HCWs; shortage may worsen                                                                                                                                                                                       | none                                                                                                                                                                                                      | none                                                                                            |
| Social inequalities                                | lack of data; digital services provision may increase social inequality and affect vulnerable groups most strongly; employment loss during the pandemic may restrict fertility decisions                                                                    | none                                                                                                                                                                                                      | none                                                                                            |
| <b>Gender-based violence</b>                       |                                                                                                                                                                                                                                                             |                                                                                                                                                                                                           |                                                                                                 |
| Summary                                            | increase but poor data; some attention to the problem and expansion of services; digital service provision                                                                                                                                                  | Government introduced new programs and significantly increased budgets; improved support for victims, some attention to men/offenders and to protection                                                   | some attention and new programs                                                                 |
| Access to services                                 | routine health and legal services were kept open but often moved to digital provision; regional variation; digital services may restrict access                                                                                                             | Coronavirus Domestic Violence Support Package introduced in March 2020 including AUS 150 million                                                                                                          | some attention and new programs                                                                 |

|                                                                                        |                                                                                                                                                                                                                                                                                                    |                                                                                                                                                                                                                                                                                        |                                                    |
|----------------------------------------------------------------------------------------|----------------------------------------------------------------------------------------------------------------------------------------------------------------------------------------------------------------------------------------------------------------------------------------------------|----------------------------------------------------------------------------------------------------------------------------------------------------------------------------------------------------------------------------------------------------------------------------------------|----------------------------------------------------|
|                                                                                        |                                                                                                                                                                                                                                                                                                    | budget and National Partnership Agreement on COVID-19 Domestic and Family Violence Responses; responses to increased demand and new needs, e.g. supporting transformation to digital provision and people in remote/rural areas                                                        |                                                    |
| Scaling-up/<br>new programs<br>and training<br>programs                                | expansion of family violence phone services; expansion of support, e.g. short-term accommodation; improved protective equipment; improved technical support; support for men's behaviour programs; high regional variation; improved awareness but no new training programs to improve sensitivity | significant increase in budgets, including increase in capacity of nationwide family violence services, men's counselling, perpetrator intervention, women's safety at home, support for trafficked people; in Victoria additional funding was made available to meet increased demand | Introduced programs extended or new programs added |
| Access of<br>HCWs to help-<br>lines                                                    | some local health services may be available but no national program; high variation                                                                                                                                                                                                                | none                                                                                                                                                                                                                                                                                   | none                                               |
| Social<br>inequalities                                                                 | pandemic restrictions threaten vulnerable groups most strongly; digital provision exacerbates inequalities                                                                                                                                                                                         | lack of attention but some support for people in remote areas to mitigate disadvantages of digital services                                                                                                                                                                            | none                                               |
| <b>Gender<br/>equality</b>                                                             |                                                                                                                                                                                                                                                                                                    |                                                                                                                                                                                                                                                                                        |                                                    |
| Summary                                                                                | lack of attention to gender equality and mainstreaming policy; poor participation of women and female leadership; some support for HCWs with childcare responsibilities                                                                                                                            | none, except provision of free childcare during the first period of lockdowns                                                                                                                                                                                                          | none                                               |
| Women/ female<br>leadership in<br>health policy<br>and COVID-19<br>governing<br>boards | lack of attention to female leadership and participation in National Advisory Committee; overall lack of data                                                                                                                                                                                      | none; equal opportunity law not systematically applied to pandemic policy and governance; no monitoring                                                                                                                                                                                | none                                               |
| Gender equality<br>goals in<br>pandemic<br>policy                                      | none                                                                                                                                                                                                                                                                                               | none                                                                                                                                                                                                                                                                                   | none                                               |
| Gender equality<br>goals in<br>research                                                | lack of attention and incentives                                                                                                                                                                                                                                                                   | none                                                                                                                                                                                                                                                                                   | none                                               |
| Access to<br>childcare                                                                 | facilities were kept open with a few exemptions; regional variation                                                                                                                                                                                                                                | Government provided free childcare during lockdown in 2020; in case of closures services were kept open for HCWs and vulnerable families                                                                                                                                               | none                                               |
| Access to<br>schools                                                                   | periods of closures but strong regional variation; move to digital schooling                                                                                                                                                                                                                       | schools were kept open for essential workers/HCWs and vulnerable families                                                                                                                                                                                                              | none                                               |
| Social<br>inequalities                                                                 | increase in gendered inequalities with intersectional effects                                                                                                                                                                                                                                      | lack of attention but some support for remote areas                                                                                                                                                                                                                                    | none                                               |

Source: authors' own table, based on expert information, published secondary sources

## Key references

- Australian College of Midwives (ACM) (2020). Women's experiences of maternity care at the height of COVID-19 ACT: Australian College of Midwives. <https://www.midwives.org.au/news/womens-experiences-maternity-care-height-covid-19>
- Boxall, H., Morgan, A., & Brown, R. (2020). The prevalence of domestic violence among women during the COVID-19 Pandemic. Statistical Bulletin no. 28. Australian Institute of Criminology. <https://www.aic.gov.au/publications/sb/sb28>
- Department of Health and Human Services (2020). Visiting hospitals: rest of Victoria Melbourne. Australia Department of Health and Human Services. <https://www.dhhs.vic.gov.au/visiting-hospitals-covid-192020>
- Frankham, L.J., Thorsteinsson, E.B., & Bartik, W. (2021). Antenatal depression and the experiences of Australian women in the maternity system during the COVID-19 pandemic. Open Journal of Depression, 10, 155–167. <https://www.scirp.org/journal/ojd>
- Johnston, R.M., Mohammed, A., & van der Linden, C. (2020). Evidence of exacerbated gender inequality in child care obligations in Canada and Australia during the COVID-19 pandemic. Politics & Gender, 16(4), 1131–1141. doi:10.1017/S1743923X20000574
- National Health and Medical Research Council (2021). National COVID-19 Health and Research Advisory. NHMRC. <https://www.nhmrc.gov.au/about-us/leadership-and-governance/committees/national-covid-19-health-and-research-advisory-committee>
- Parliament of Australia (2020). Family violence in Australia and the National Plan. Parliament of Australia. [https://www.aph.gov.au/Parliamentary\\_Business/Committees/House/Social\\_Policy\\_and\\_Legal\\_Affairs/FamilyViolence/Report/section?id=committees%2Freportrep%2F024577%2F75208](https://www.aph.gov.au/Parliamentary_Business/Committees/House/Social_Policy_and_Legal_Affairs/FamilyViolence/Report/section?id=committees%2Freportrep%2F024577%2F75208)
- Pfifzner, N., Fitz-Gibbon, K., & True, J. (2020). Responding to the 'shadow pandemic': practitioner views on the nature of and responses to violence against women in Victoria, Australia during the COVID-19 restrictions. Monash University, Victoria, Australia. <https://apo.org.au/sites/default/files/resource-files/2020-06/apo-nid306064.pdf>
- Royal Australia and New Zealand College of Obstetricians and Gynaecologists (RANZCOG) (2020). COVID-19 Hub Melbourne. RANZCOG. <https://ranzocg.edu.au/statements-guidelines/covid-19-statement>
- Swannell, C. (2020). Early medical abortion: telehealth restrictions discriminatory. The Medical Journal of Australia, 21, 1. <https://www.mja.com.au/system/files/2020-09/FINAL%2021%20SEP%20EMA.pdf>
- Wood, D., Griffiths, K., & Crowley, T. (2021). Women's work: the impact of the COVID crisis on Australian women. Grattan Institute. <https://grattan.edu.au/report/womens-work/>
- Zhou, N. (2020). Female enrolment at Australian universities dropped by 86,000 in 2020 as 'pink recession' hit. The Guardian. <https://www.theguardian.com/australia-news/2020/nov/12/female-enrolment-at-australian-universities-dropped-by-86000-in-2020-as-pink-recession-hit>

**Appendix Table 1.2 Brazil, country case study summary**

| <b>SDG5</b>                                | <b>Impact</b>                                                                                                                                                                                                                         | <b>Action</b>                                                                                                                                                                                                                                                                      | <b>Future Policy</b>                                                  |
|--------------------------------------------|---------------------------------------------------------------------------------------------------------------------------------------------------------------------------------------------------------------------------------------|------------------------------------------------------------------------------------------------------------------------------------------------------------------------------------------------------------------------------------------------------------------------------------|-----------------------------------------------------------------------|
| <b>Maternity care/ reproductive health</b> |                                                                                                                                                                                                                                       |                                                                                                                                                                                                                                                                                    |                                                                       |
| Summary                                    | essential services were kept open but with limited access; strong restrictions to prevention and support services; new digital services; 40% increase in maternal deaths in 2020/21 compared to previous year                         | none; a general trend of decreasing healthcare budgets since 2015 exacerbated the impact of COVID-19                                                                                                                                                                               | maintenance of essential maternity care services during health crises |
| Maternity care                             | limited access to/ accessibility of services due to pandemic restrictions and re-allocation of HCWs; new digital service delivery                                                                                                     | none except new digital services; service restrictions due to COVID-19 prioritisation                                                                                                                                                                                              | maintenance of primary and specialised services during health crises  |
| Reproductive services                      | limited access to services due to pandemic restrictions and move of HCWs; new digital services                                                                                                                                        | none, except new digital services; services reduced due to COVID-19 prioritisation                                                                                                                                                                                                 | none                                                                  |
| Reproductive rights                        | no public debate; no explicit restrictions                                                                                                                                                                                            | none; support of maintenance of legal abortion by feminist initiatives, including moving service to digital offers                                                                                                                                                                 | none                                                                  |
| Care for pregnant women/ vaccination       | inclusion in vaccination programs, but too late                                                                                                                                                                                       | initial prioritisation of all pregnant women suspended by Ministry of Health in May 2021 and restricted to proof of co-morbidities; criteria of the Operational Plan for comorbidities were very strict and did not cover all situations of gestational risk                       | none                                                                  |
| Health labour market and employment        | strong shortage of HCWs in primary and specialised care regardless due to prioritisation of COVID-19 services; higher infection risk of HCWs providing COVID-19 care                                                                  | none                                                                                                                                                                                                                                                                               | none                                                                  |
| Social effects/ inequalities               | increase in social inequalities; maternal death rate was higher among low-income and black women; new digital services may exacerbate inequalities                                                                                    | none; efforts of civil society groups to raise awareness                                                                                                                                                                                                                           | none                                                                  |
| <b>Gender-based violence</b>               |                                                                                                                                                                                                                                       |                                                                                                                                                                                                                                                                                    |                                                                       |
| Summary                                    | increase of vulnerability but underreporting; reduced opportunity to report; closure of public defenders' offices and transformation to digital services; decrease of 14% in denounces in 2020; strong regional variety; lack of data | intention to create a National Plan against Femicide (Dec. 2020) by federal Government but no signs of implementation; closure of specialised services; reduced collection of data; efforts by municipalities, NGOs and private actors to improve sensitivity and support services | none                                                                  |

|                                                                         |                                                                                                                                                                                                                                                                                                            |                                                                                                                                                                                                                                             |      |
|-------------------------------------------------------------------------|------------------------------------------------------------------------------------------------------------------------------------------------------------------------------------------------------------------------------------------------------------------------------------------------------------|---------------------------------------------------------------------------------------------------------------------------------------------------------------------------------------------------------------------------------------------|------|
| Access to services                                                      | women's policy stations remained open but limited opportunity to report violence; strong restrictions in access to all services; new digital services; digital provision reduced access of women who lived with the aggressor; services strongly decentralised with high variety and regional differences. | none on national level; efforts by some municipalities, NGOs and private companies to bypass national policy, to improve reporting (e.g. digital) and provide services; support by global NGOs                                              | none |
| Scaling-up/new programs and training programs                           | strong limitations due to pandemic priorities and restrictions; strong regional variation; some transformation to digital services                                                                                                                                                                         | none on national level; some efforts by municipalities, NGOs and private companies to mitigate the problem, keep services open and introduce new programs, including digital offers; some support by global NGOs (e.g. UNICEF)              | none |
| Access of HCWs to help-lines                                            | limited access and longer waiting times; increased need; 30% of HCWs surveyed 2020-21 reported abuse had worsened                                                                                                                                                                                          | none on national level; some municipalities introduced mental health services for HCWs                                                                                                                                                      | none |
| Social effects/inequalities                                             | increased vulnerability of women living with the aggressor; digitalisation exacerbates social inequalities; lack of data                                                                                                                                                                                   | none                                                                                                                                                                                                                                        | none |
| <b>Gender equality</b>                                                  |                                                                                                                                                                                                                                                                                                            |                                                                                                                                                                                                                                             |      |
| Summary                                                                 | participation of women and female leadership were very poor and weakened; strong political dominance of men; lack of data                                                                                                                                                                                  | none; gender equal goals and monitoring were absent; male dominance in government was strengthened; a National Plan against Femicide was initiated but not implemented;                                                                     | none |
| Women/ female leadership in health policy and COVID-19 governing boards | no; Bolsonaro government has one of the lowest rates in the history of women ministers; all high-level positions related to the pandemic are held by men                                                                                                                                                   | none; all high-level positions related to the pandemic were provided to men; replacements in the Health Ministry were filled by men only; equal opportunity goals not applied to pandemic policy and governance; no monitoring established; | none |
| Gender equality goals in pandemic policy                                | None; no prioritisation of all pregnant women in the vaccination calendar, but some municipalities changed the status to priority after strong complaints                                                                                                                                                  | none; general lack of pandemic policies and establishment of specific decision-making bodies on national level; some attention on the level of municipalities                                                                               | none |
| Gender equality goals in research                                       | None                                                                                                                                                                                                                                                                                                       | none, lack of attention and data                                                                                                                                                                                                            | none |
| Access to childcare                                                     | closed during 2020/21 and reopened in November 2021                                                                                                                                                                                                                                                        | none                                                                                                                                                                                                                                        | none |
| Access to schools                                                       | closed during 2020/21 with online classes and fully reopened in November 2021                                                                                                                                                                                                                              | none                                                                                                                                                                                                                                        | none |
| Social effects/inequalities                                             | increase in intersecting inequalities as women live more often in vulnerable conditions; lack of data                                                                                                                                                                                                      | none                                                                                                                                                                                                                                        | none |

Source: authors' own table, based on expert information and published secondary sources

### Key references

- Amorim, M.M.R., Takemoto, M.L.S., & Fonseca, E.B.D. (2020). Maternal deaths with coronavirus disease 2019: a different outcome from low- to middle-resource countries? *American Journal of Obstetrics & Gynecology*, 223(2), 298–299. <https://pubmed.ncbi.nlm.nih.gov/32348744/>
- Diniz D., Brito, L., & Rondon, G. (2022). Maternal mortality and the lack of women-centered care in Brazil during COVID-19: preliminary findings of a qualitative study. *Lancet Regional Health – Americas*, 10, 100239. [https://www.thelancet.com/journals/lanam/article/PIIS2667-193X\(22\)00056-4/fulltext](https://www.thelancet.com/journals/lanam/article/PIIS2667-193X(22)00056-4/fulltext)
- Ferigato, S., Fernandez, M., Amorim, M., Ambrogi, I., Fernandes, L.M.M., & Pacheco, R. (2020). The Brazilian Government's mistakes in responding to the COVID-19 pandemic. *Lancet*, 396(10263), 1636. <https://pubmed.ncbi.nlm.nih.gov/33096042/>
- Fernandez, M., & Amorim, M.M.R. (2021). Morte de grávidas e puérperas por COVID-19. *Rede Brasileira de Mulheres Cientistas. Nota Técnica*, 2021, 1. <https://mulherescientistas.org/wp-content/uploads/2021/05/Nota-Tecnica-n.1-Gravidas-e-Puerperas.pdf>
- Fórum Brasileiro de Segurança Pública. Violência doméstica durante a pandemia de Covid-19. (2020, April 16). Fórum Brasileiro de Segurança Pública. <https://forumseguranca.org.br/wp-content/uploads/2020/06/violencia-domestica-covid-19-ed02-v5.pdf>
- Jaccoud, L., Sátyro, N., Gomes, S., Vieira, F., Servo, L., & Fernandez, M. (2021). Por que a coordenação nacional de políticas públicas importa para os direitos dos cidadãos, especialmente na pandemia? *Rede Brasileira de Mulheres Cientistas. Nota Técnica*, 2021, 11. <https://mulherescientistas.org/wp-content/uploads/2021/07/NT-11.pdf>
- Marques, E.S., Moraes, C.L., Hasselman, M.H., Deslandes, S.F., & Reichenheim, M.E.A. (2020). Violência contra mulheres, crianças e adolescentes em tempos de pandemia pela COVID-19: panorama, motivações e formas de enfrentamento. *Cad. Saúde Pública*, 36(4), e00074420. <https://doi.org/10.1590/0102-311X00074420>
- Menezes, M.O., Takemoto, M.L.S., Nakamura-Pereira, M., Katz, L., Amorim, M.M.R., Salgado, H.O., Melo, A., Diniz, C.S.G., de Sousa, L.A.R., Magalhães, C.G., Knobel, R., & Andreucci, C.B. (2020). Brazilian Group of Studies for COVID-19. Risk factors for adverse outcomes among pregnant and postpartum women with acute respiratory distress syndrome due to COVID-19. *International Journal of Gynaecology and Obstetrics*, 151(3), 415–423. doi: [10.1002/ijgo.13407](https://doi.org/10.1002/ijgo.13407)
- Silva, V.R., & Ferreira, L. (2020, July 2). Só 55% dos hos dos hospitais que ofereciam serviço de aborto legal no Brasil seguem atendendo na pandemia. *Gênero e Número*. <http://www.generonumero.media/so-55-dos-hospitais-que-ofereciam-servico-de-aborto-legal-no-brasil-seguem-atendendo-na-pandemia/>
- Takemoto, M.L.S., Menezes, M.O., Andreucci, C.B., Knobel, R., Sousa, L.A.R., Katz L., Fonseca, E.B., Magalhães, C.G., Oliveira, W.K., Rezende-Filho, J., Melo, A.S.O., & Amorim, M.M.R. (2020). Maternal mortality and COVID-19. *Journal of Maternal-Fetal & Neonatal Medicine*, 16, 1–7. doi: 10.1080/14767058.2020.1786056
- Wenham, C., Fernandez, M., Corrêa, M.G., Lotta, G., Schall, B., Rocha, M.C., & Pimenta, D.N.G (2021). Gender and race on the frontline: experiences of health workers in Brazil during the COVID-19 pandemic. *Social Politics: International Studies in Gender, State & Society*, online. doi:10.1093/sp/jxab031
- Zignoni, C. (2020, April 9). O governo que odeia as mulheres: a inércia de Damares Alves na crise do Covid-19. *INESC*. <https://www.inesc.org.br/o-governo-que-odeia-as-mulheres-a-inercia-de-damares-alves-na-crise-da-codiv-19/>

**Appendix Table 1.3 Germany, country case study summary**

| <b>SDG5</b>                                        | <b>Impact</b>                                                                                                                                                                                                                                                                                      | <b>Action</b>                                                                                                                                                          | <b>Future Policy</b>                                                           |
|----------------------------------------------------|----------------------------------------------------------------------------------------------------------------------------------------------------------------------------------------------------------------------------------------------------------------------------------------------------|------------------------------------------------------------------------------------------------------------------------------------------------------------------------|--------------------------------------------------------------------------------|
| <b>Maternity care/<br/>reproductive<br/>health</b> |                                                                                                                                                                                                                                                                                                    |                                                                                                                                                                        |                                                                                |
| Summary                                            | essential services were kept open; restrictions to prevention and support services; new digital services; some evidence of slightly higher rates of premature births and cesarean deliveries; lack of comprehensive epidemiological data                                                           | action was limited to vaccination recommendation and expansion of digital services; in 2022 legal change to de-criminalise physicians' advertisement of early abortion | no attention beyond routine services and existing mandatory legal requirements |
| Maternity care                                     | access to essential services, but pandemic restrictions (e.g. face mask during birthing; no access of partners; delayed admission in case of COVID-19 infection); local variation; strong restrictions of non-essential services, especially prevention and counselling; digital service provision | new digital services; reimbursement of digital services through social health insurance funds                                                                          | implementation of digital services in routine care under consideration         |
| Reproductive services                              | essential services remained open but pandemic restrictions; suspension/ limitations in prevention and support services; staff moved to COVID-19 services; regional/ organisational variation; digital provision                                                                                    | none, except transformation of some services to digital provision                                                                                                      | none                                                                           |
| Reproductive rights                                | no restrictions, but negative impact through limited access and availability of services                                                                                                                                                                                                           | no change to rights/restrictions, but decriminalisation of physicians' advertisement of early abortion services                                                        | none                                                                           |
| Care for pregnant women/<br>vaccination            | included in vaccination programs but delayed recommendation by national authorities, also for breast-feeding women                                                                                                                                                                                 | none, except mandatory inclusion of women in vaccine studies; no midwifery experts in pandemic policy                                                                  | none                                                                           |
| Health labour market and employment                | high infection risk of midwives; digital services more difficult for self-employed midwives due to high costs and training needs; may reinforce HCW shortage due to drop-outs                                                                                                                      | none, except mandatory infection prevention law to exclude pregnant midwives and other HCWs from patient care, with full compensation                                  | none                                                                           |
| Social inequalities                                | increased inequalities; increased discrimination; restricted prevention and support services threaten all vulnerable groups (migrants, asylum seekers, ethnic minorities, elderly) most strongly; digitalisation exacerbates inequalities                                                          | none; some local variation may apply; some action taken by feminist and migrant networks/ NGOs; no systematic data and monitoring available                            | none                                                                           |
| <b>Gender-based violence</b>                       |                                                                                                                                                                                                                                                                                                    |                                                                                                                                                                        |                                                                                |
| Summary                                            | some attention to the problem; data vary between sources but all show strong increases in all forms of violence; e.g. increase > 100%, during quarantine 7.5% of women/                                                                                                                            | none; some action taken by NGOs and feminist networks; some media attention but not connected to pandemic policy                                                       | none                                                                           |

|                                                                         |                                                                                                                                                                                                                                                                                                    |                                                                                                                                                                                                  |                                                   |
|-------------------------------------------------------------------------|----------------------------------------------------------------------------------------------------------------------------------------------------------------------------------------------------------------------------------------------------------------------------------------------------|--------------------------------------------------------------------------------------------------------------------------------------------------------------------------------------------------|---------------------------------------------------|
|                                                                         | 10.5% of children experienced sexual violence                                                                                                                                                                                                                                                      |                                                                                                                                                                                                  |                                                   |
| Access to services                                                      | routine health and legal services were kept open but prevention services strongly limited due to lockdown and allocation of staff to pandemic prevention; increase in digital services; NGOs/ feminist groups are important service providers but with limited resources                           | no response to new needs; lack of coherent monitoring/ data are scattered and not standardised; feminist activists not included in pandemic governance                                           | none                                              |
| Scaling-up/ new programs and training programs                          | feminist advocacy and some service expansion but no new approaches/ training programs; restrictions due to pandemic policy; regional variation                                                                                                                                                     | None                                                                                                                                                                                             | none                                              |
| Access of HCWs to help-lines                                            | routine services and occupational health services for hospital staff; no specific help-lines for HCWs                                                                                                                                                                                              | none; no support from health professional associations, but some student groups set up online platforms                                                                                          | none                                              |
| Social inequalities                                                     | limited access to services and pandemic policies threaten vulnerable groups most strongly; new need for targeted services for migrants/asylum seekers, minorities; digitalisation worsens inequalities                                                                                             | none                                                                                                                                                                                             | none                                              |
| <b>Gender equality</b>                                                  |                                                                                                                                                                                                                                                                                                    |                                                                                                                                                                                                  |                                                   |
| Summary                                                                 | participation of women and female leadership poorly developed and weakened; male scientists more visible in the media; lack of data                                                                                                                                                                | none, gender mainstreaming and equal opportunity policy were largely ignored; some sensitivity and more balanced gender composition in new Coalition Government                                  | none, except some general gender equality targets |
| Women/ female leadership in health policy and COVID-19 governing boards | weak female leadership and participation; no spill-over from female Chancellor (until autumn 2021); women and female groups poorly represented in pandemic policy; no mandatory inclusion of equal opportunity officers in hospital COVID-19 Task Forces; weak media presence of female scientists | none; equal opportunity law not systematically applied to pandemic policy and governance; lack of transparency; no monitoring system; more recently some attention to female COVID-19 scientists | none                                              |
| Gender equality goals in pandemic policy                                | largely ignored on all levels                                                                                                                                                                                                                                                                      | none                                                                                                                                                                                             | none                                              |
| Gender equality goals in research                                       | lack of data and incentives; little public attention                                                                                                                                                                                                                                               | none, except mandatory inclusion of female participants in vaccine testing                                                                                                                       | none                                              |
| Access to childcare                                                     | for essential workers/ HCWs, but often strongly limited and not reliable due to staff shortage                                                                                                                                                                                                     | none                                                                                                                                                                                             | none                                              |
| Access to schools                                                       | closed during the first wave; re-open with some restrictions/ uncertainties                                                                                                                                                                                                                        | none, but critical public debate, including attention to increased workload of women                                                                                                             | none                                              |
| Social inequalities                                                     | increase in gendered inequalities with strong intersectional effects                                                                                                                                                                                                                               | lack of political attention                                                                                                                                                                      | none                                              |

Source: authors' own table, based on expert information and secondary sources



## Key references

- Allmendinger, J. (2020). Kritik am Leopoldina Statement: Das Wohlergehen der Frauen wird nicht adressiert. Tagesspiegel. <https://www.tagesspiegel.de/wissen/kritik-an-leopoldina-empfehlung-das-wohlergehen-der-frauen-wird-nicht-adressiert/25739444.html>
- Bariola, N., & Collins, C. (2021). The gendered politics of pandemic relief: labor and family policies in Denmark, Germany, and the United States during COVID-19. *American Behavioral Scientist*, 65(12), 1671–169. <https://journals.sagepub.com/doi/pdf/10.1177/00027642211003140>
- Ciesek, S. (2022). Virologie im Medienfokus: Lehren aus der Corona-Krise. *Labourjournal*, Juli/August, 8-11. [https://www.laborjournal.de/rubric/essays/essays2022/e22\\_01.php](https://www.laborjournal.de/rubric/essays/essays2022/e22_01.php)
- Czymara, C.S., Langenkamp, A., & Cano, T. (2021). Cause for concerns: gender inequality in experiencing the COVID-19 lockdown in Germany. *European Societies*, 23 (Suppl1), S68–81. <https://www.tandfonline.com/doi/full/10.1080/14616696.2020.1808692>
- Engelhardt, M., Krautstengel, A., Patzelt, L., Gaudion, M., Kamhiye, J., & Borde, T. (2021). Auswirkungen der Covid-19 Pandemie auf die Versorgungssituation von geflüchteten Frauen während Schwangerschaft und Geburt. *Zeitschrift für Geburtshilfe und Neonatologie*, 225(S 01), P141. <https://doi.org/10.1055/S-0041-1739903>
- Pro Familia Medizin (2020). Corona Krise: Reproductive Health Facts – ein Zwischenstand. Nr 1, 1–16. [https://www.profamilia.de/fileadmin/dateien/fachpersonal/familienplanungsrundbrief/pro\\_familia\\_medizin\\_1-2020.pdf](https://www.profamilia.de/fileadmin/dateien/fachpersonal/familienplanungsrundbrief/pro_familia_medizin_1-2020.pdf)
- Hagenbeck, C., Pecks, U., Fehm, T., Borgmeier, F., Schleußner, E., & Zöllkau, J. (2020). Pregnancy, birth, and puerperium with SARS-CoV-2 and COVID-19. *Gynäkologe*, 53(9), 614–623. <https://doi.org/10.1007/S00129-020-04637-9/TABLES/2>
- Hipp, L., & Bünning, M. (2021). Parenthood as a driver of increased gender inequality during COVID-19? Exploratory evidence from Germany. *European Societies*, 23(S1), S658–S673. [https://doi.org/10.1080/14616696.2020.1833229/SUPPL\\_FILE/REUS\\_A\\_1833229\\_SM7875.DOCX](https://doi.org/10.1080/14616696.2020.1833229/SUPPL_FILE/REUS_A_1833229_SM7875.DOCX); <https://www.tandfonline.com/doi/pdf/10.1080/14616696.2020.1833229?needAccess=true>
- Schmiedhofer, M., Derksen, C., Dietl, J.E., Häussler, F., Louwen, F., Hüner, B., Reister, F., Strametz, R., & Lippke, S. (2022). Birthing under the condition of the COVID-19 pandemic in Germany: interviews with mothers, partners, and obstetric health care workers. *Int. J. Environ. Res. Public Health*, 19(3), 1486. <https://doi.org/10.3390/ijerph19031486>
- Steiner, J., & Ebert, C. (2020). Tatort Wohnzimmer: Gewalt gegen Frauen und Kinder im Corona Lockdown. *Ärztetag Podcast*. <https://www.aerztezeitung.de/Podcasts/Tatort-Wohnzimmer-Gewalt-gegen-Kinder-und-Frauen-im-Corona-Lockdown-410287.html>
- Zoch, G., Bächmann, A.-C., & Vicari, B. (2020). Care arrangements and parental well-being during the COVID-19 pandemic in Germany. *LifBi Working Paper No. 91*. Leibniz Institute for Educational Trajectories. <https://doi.org/10.5157/LifBi:WP91:2.0>

**Appendix Table 1.5 United Kingdom, country case study summary**

| <b>SDG5</b>                                        | <b>Impact</b>                                                                                                                                                                            | <b>Action</b>                                                                                                                                                                                                                                              | <b>Future Policy</b>                                                                   |
|----------------------------------------------------|------------------------------------------------------------------------------------------------------------------------------------------------------------------------------------------|------------------------------------------------------------------------------------------------------------------------------------------------------------------------------------------------------------------------------------------------------------|----------------------------------------------------------------------------------------|
| <b>Maternity care/<br/>reproductive<br/>health</b> |                                                                                                                                                                                          |                                                                                                                                                                                                                                                            |                                                                                        |
| Summary                                            | essential services remained open but limited access and some replacement by digital provision; strong limitations in non-essential and support services; increase in social inequalities | maternity care was defined as essential service but restrictions due to pandemic policies and lack of resources; no prioritisation of reproductive health; some action by NHS England to support mothers from minority groups; variation due to devolution | none                                                                                   |
| Maternity care                                     | essential services remained open but access was limited; strong limitations in support service; limited partner support; new digital services                                            | maternity care was defined as essential service but lack of attention and resources                                                                                                                                                                        | none                                                                                   |
| Reproductive services                              | strong limitations in provision and access to services due to pandemic restrictions and closure of services; new digital services                                                        | no prioritisation of services; introduction of new digital services in NHS services; in March 2020 temporary support of abortion services through availability of early abortion pills without medical supervision                                         | none                                                                                   |
| Reproductive rights                                | temporary legal change                                                                                                                                                                   | temporary legalisation (March 2020) of at-home administration of early abortion pills, previously only available for second pill                                                                                                                           | permanent availability of at-home administration in England/ Wales; Scotland to decide |
| Care for pregnant women/<br>vaccination            | inclusion in vaccination programs                                                                                                                                                        | none, except vaccination recommendation                                                                                                                                                                                                                    | none                                                                                   |
| Health labour market and employment                | higher infection risk of HCWs providing COVID-19 care; poor protection and poor worker rights of pregnant HCWs                                                                           | lack of full legal protection; risk assessment of pregnant women by employer introduced                                                                                                                                                                    | none                                                                                   |
| Social inequalities                                | increase in social inequalities, especially affecting minority and vulnerable groups                                                                                                     | none; some action by NHS England to support pregnant women from minority groups                                                                                                                                                                            | none                                                                                   |
| <b>Gender-based violence</b>                       |                                                                                                                                                                                          |                                                                                                                                                                                                                                                            |                                                                                        |
| Summary                                            | strong increase of sexual violence; some expansion of services and digital provision, but limited access due to pandemic restrictions                                                    | increased budgets/public funding of services; new law in 2021 to better protect survivors; introduction of digital services                                                                                                                                | none                                                                                   |
| Access to services                                 | services were kept open or provided digital, but limitations due to COVID-19 restrictions                                                                                                | increased budgets and public funding of services; improved financial support for NGOs/Charities providing services; digital service                                                                                                                        | none                                                                                   |

|                                                                                        |                                                                                                                                                                                                                                                                                                           |                                                                                                                                                                                                                                                                    |                                                          |
|----------------------------------------------------------------------------------------|-----------------------------------------------------------------------------------------------------------------------------------------------------------------------------------------------------------------------------------------------------------------------------------------------------------|--------------------------------------------------------------------------------------------------------------------------------------------------------------------------------------------------------------------------------------------------------------------|----------------------------------------------------------|
|                                                                                        |                                                                                                                                                                                                                                                                                                           | provision; expansion of access through inclusion of pharmacists                                                                                                                                                                                                    |                                                          |
| Scaling-up/<br>new programs<br>and training<br>programs                                | some expansion of services; some new programs; inclusion of new professional groups; no new training schemes                                                                                                                                                                                              | expansion of providers; new emergency program 'Ask for ANI' (Action Needed Immediately) in collaboration with pharmacists; launch of public awareness campaign; Domestic Abuse Act 2021 aims to better protect survivors and address the behaviour of perpetrators | none                                                     |
| Access of<br>HCWs to help-<br>lines                                                    | no specific program                                                                                                                                                                                                                                                                                       | none                                                                                                                                                                                                                                                               | none                                                     |
| Social<br>inequalities                                                                 | lack of data, but increased disadvantage of minorities and vulnerable groups, especially through digital services                                                                                                                                                                                         | none                                                                                                                                                                                                                                                               | none                                                     |
| <b>Gender<br/>equality</b>                                                             |                                                                                                                                                                                                                                                                                                           |                                                                                                                                                                                                                                                                    |                                                          |
| Summary                                                                                | participation of women was limited and female leadership lacking; lack of attention to gender equality goals; increase in intersecting inequalities                                                                                                                                                       | none                                                                                                                                                                                                                                                               | Scotland to embed the UN CEDAW convention into Scots Law |
| Women/ female<br>leadership in<br>health policy<br>and COVID-19<br>governing<br>boards | marginalisation of women in high-level media events; in 2020 43% of daily COVID-19 press conferences featured only male politicians and experts; participation in the Scientific Advisory Group of Experts (SAGE) ranged between 33%-44% and was nearly balanced 2021, but no gender advisor was included | none; equal opportunity goals were not applied to pandemic policy                                                                                                                                                                                                  | none                                                     |
| Gender equality<br>goals in<br>pandemic<br>policy                                      | lack of attention                                                                                                                                                                                                                                                                                         | none, except inclusion of COVID-19 vaccination in pregnancy monitoring and attention to men's higher risk of severe COVID-19 disease; worsening legal conditions and data through suspension of gender pay gap reporting for employers                             | none                                                     |
| Gender equality<br>goals in<br>research                                                | none                                                                                                                                                                                                                                                                                                      | none                                                                                                                                                                                                                                                               | none                                                     |
| Access to<br>childcare                                                                 | facilities were closed during lockdowns; open for essential workers including HCWs                                                                                                                                                                                                                        | none                                                                                                                                                                                                                                                               | none                                                     |
| Access to<br>schools                                                                   | Schools were closed during first lockdown; open for essential workers including HCWs; remained open for all during second lockdown                                                                                                                                                                        | none                                                                                                                                                                                                                                                               | none                                                     |
| Social<br>inequalities                                                                 | increase in intersecting inequalities affecting ethnic minorities and vulnerable groups most strongly; digital service provision worsens inequalities; career disadvantages                                                                                                                               | none                                                                                                                                                                                                                                                               | none                                                     |

|  |                                          |  |  |
|--|------------------------------------------|--|--|
|  | of women with childcare responsibilities |  |  |
|--|------------------------------------------|--|--|

Source: authors' own table, based on expert information and secondary sources

#### Key references

- Bradbury-Jones, C., & Isham, L. (2020). The pandemic paradox: the consequences of COVID-19 on domestic violence. *Journal of Clinical Nursing*, 29, 2047–2049. <https://onlinelibrary.wiley.com/doi/epdf/10.1111/jocn.15296>
- Herten-Crabb, A., & Wenham, C. (2022). "I was facilitating everybody else's life. And mine had just ground to a halt": the COVID-19 pandemic and its impact on women in the United Kingdom. *Social Politics: International Studies in Gender, State & Society*, online. <https://doi.org/10.1093/sp/jxac006>
- Iacobucci, G. (2021). Covid-19: Female NHS and care staff report deteriorating health because of pandemic. *BMJ*, 373, n1157. <https://doi.org/10.1136/bmj.n1157>
- Jardine, J., Relph, S., Magee, L., von Dadelszen, P., Morris, E., Ross-Davie, M., Draycott, T., & Khalil, A. (2021). Maternity services in the UK during the coronavirus disease 2019 pandemic: a national survey of modifications to standard care. *BJOG: An International Journal of Obstetrics & Gynaecology*, 128(5), 880–889. <https://doi.org/10.1111/1471-0528.16547>
- Karavadra, B., Stockl, A., Prosser-Snelling, E., Simpson, P., & Morris, E. (2020). Women's perceptions of COVID-19 and their healthcare experiences: a qualitative thematic analysis of a national survey of pregnant women in the United Kingdom. *BMC Pregnancy and Childbirth*, 20(1), 600. <https://doi.org/10.1186/s12884-020-03283-2>
- Kourti, A., Stavridou, A., Panagouli, E., Psaltopoulou, T., Spiliopoulou, C., Tsolia, M., Sergentanis, T. N., & Tsitsika, A. (2021). Domestic violence during the COVID-19 pandemic: a systematic review. *Trauma, Violence, & Abuse*, online. <https://doi.org/10.1177/15248380211038690>
- Mansour, D. (2021). Maintaining sexual and reproductive health services in the UK during COVID-19. *BMJ Sexual & Reproductive Health*, 47(4), 235–237. <https://doi.org/10.1136/bmj.srh-2021-201142>
- Quach, G. (2022, January 21). Only two UK Covid briefings were led by a female MP, report finds. *The Guardian*. <https://www.theguardian.com/world/2022/jan/21/only-two-uk-covid-briefings-female-mp-2022-sex-and-power-index>
- Strauss, C., & Patel-Campbell, C. (2021). May 2021 update: COVID-19 and the female health and care workforce survey. NHS Confederation. <https://www.nhsconfed.org/publications/may-2021-update-covid-19-and-female-health-and-care-workforce-survey>
- UK Government. (2021, January 14). Pharmacies launch codeword scheme to offer 'lifeline' to domestic abuse victims. GOV.UK. <https://www.gov.uk/government/news/pharmacies-launch-codeword-scheme-to-offer-lifeline-to-domestic-abuse-victims>
- UK Women's Budget Group. (2021, March 31). One year on: women are less likely than men to feel the Government's response to Covid-19 has met their needs. <https://wbq.org.uk/analysis/reports/one-year-on-women-are-less-likely-than-men-to-feel-the-governments-response-to-covid-19-has-met-their-needs/>

**Appendix Table 1.5 USA, country case study summary**

| <b>SDG5</b>                                        | <b>Impact</b>                                                                                                                                                                                                                                                                                                                            | <b>Action</b>                                                                                                                                                                                                                                                       | <b>Future Policy</b>                                                                                  |
|----------------------------------------------------|------------------------------------------------------------------------------------------------------------------------------------------------------------------------------------------------------------------------------------------------------------------------------------------------------------------------------------------|---------------------------------------------------------------------------------------------------------------------------------------------------------------------------------------------------------------------------------------------------------------------|-------------------------------------------------------------------------------------------------------|
| <b>Maternity care/<br/>reproductive<br/>health</b> |                                                                                                                                                                                                                                                                                                                                          |                                                                                                                                                                                                                                                                     |                                                                                                       |
| Summary                                            | decrease of prenatal care visits; increase in demand for mental healthcare; increase in maternal mortality rate (23.8 per 100,000 live births); access to maternity care services was significantly limited but partly replaced by digital services                                                                                      | new digital services included in COVID-19 emergency policies, but strong variation                                                                                                                                                                                  | extension of emergency digital maternity care and some permanent provision, but high variation        |
| Maternity care                                     | significantly limited access to services and reduced accessibility due to a general decrease and pandemic restrictions; COVID-19 restrictions strongly weaken social/partner support and support of doulas; new digital service delivery                                                                                                 | significant cuts in services due to COVID-19 policy; new digital services introduced in most insurance programs (e.g. audio-calls combined with monitoring and health coaching); high variation                                                                     | extension of emergency digital maternity care and some permanent provision; high variation            |
| Reproductive services                              | limited access to services due to pandemic restrictions and closure of services; new digital services                                                                                                                                                                                                                                    | no prioritisation of services or piecemeal implementation in state-led emergency responses; new digital services but lack of infrastructures                                                                                                                        | Department of Health and Human Services established Reproductive Healthcare Access Task Force in 2022 |
| Reproductive rights                                | strong limitations or even suspension of abortion rights through both limited access to services and new legal decisions/suspension of Roe vs Wade; high variation between states                                                                                                                                                        | 14 states suspended abortion, only 12 states explicitly protected abortion; medication abortion facilitated by telemedicine is prohibited in 18 states; some attempts to deny Medicaid coverage for certain methods of contraception; high variation between states | suspension of abortion through High Court decision but efforts to protect abortion rights             |
| Care for pregnant women/<br>vaccination            | inclusion in vaccination programs, but lack of attention to the needs of COVID-19 positive women                                                                                                                                                                                                                                         | tailored messaging to pregnant and breast-feeding women to promote vaccination                                                                                                                                                                                      | none                                                                                                  |
| Health labour market and employment                | higher infection risk of HCWs providing COVID-19 care; some task-shifting to doulas to mitigate cuts in maternity care provision                                                                                                                                                                                                         | none                                                                                                                                                                                                                                                                | none                                                                                                  |
| Social inequalities                                | increase in social inequalities; disruption of reproductive services hit vulnerable populations most strongly; restrictions of Medicaid programs most strongly affected low income people; delays or cancellation of reproductive services were higher in Black and LGBTQIA populations; digital services disadvantaged vulnerable group | none; digital services were thought to reduce racial disparities but the overall effects are less clear and may reinforce inequalities                                                                                                                              | none                                                                                                  |
| <b>Gender-based violence</b>                       |                                                                                                                                                                                                                                                                                                                                          |                                                                                                                                                                                                                                                                     |                                                                                                       |

|                                                                         |                                                                                                                                                                                                                                             |                                                                                                                                                                                          |      |
|-------------------------------------------------------------------------|---------------------------------------------------------------------------------------------------------------------------------------------------------------------------------------------------------------------------------------------|------------------------------------------------------------------------------------------------------------------------------------------------------------------------------------------|------|
| Summary                                                                 | strong increase of sexual violence while access to services was significantly limited; some underreporting due to closed services; early in the pandemic minors made up half of visitors to national sexual assault hotline                 | none                                                                                                                                                                                     | none |
| Access to services                                                      | strong limitations; one-third of women reported difficulty accessing resources after violence incidents (2020); reduced access to legal services due to courts being closed                                                                 | some digital service provision                                                                                                                                                           | none |
| Scaling-up/ new programs and training programs                          | some new programs; some exemption from closures during lockdown; strong regional variation; some transformation to digital services; no new training programs                                                                               | 21 states enacted protections for violence survivors; 5 states included explicit exemptions from non-essential business closures for providers; feminist NGOs increased support services | none |
| Access of HCWs to help-lines                                            | no information on specific programs                                                                                                                                                                                                         | none                                                                                                                                                                                     | none |
| Social inequalities                                                     | inequalities exacerbated for underserved and vulnerable populations; lack of data                                                                                                                                                           | none                                                                                                                                                                                     | none |
| <b>Gender equality</b>                                                  |                                                                                                                                                                                                                                             |                                                                                                                                                                                          |      |
| Summary                                                                 | participation of women and female leadership were overall poor; some recent increase in numbers; lack of attention to gender equality goals; lack of data                                                                                   | none                                                                                                                                                                                     | none |
| Women/ female leadership in health policy and COVID-19 governing boards | no signs of high-level female leadership but quotas may be higher at lower levels; women accounted for 10% in White House Coronavirus Task Force, but for 84% of staff of Centres for Disease Prevention and Control; data are overall poor | none; equal opportunity goals were not applied to pandemic policy; some increase in female and minority participation in the new Government (2022)                                       | none |
| Gender equality goals in pandemic policy                                | lack of attention                                                                                                                                                                                                                           | none                                                                                                                                                                                     | none |
| Gender equality goals in research                                       | none                                                                                                                                                                                                                                        | none; a criticism of COVID-19 emergency policies                                                                                                                                         | none |
| Access to childcare                                                     | strong restrictions and some closures; some HCWs lost childcare support affecting women most strongly; high variation                                                                                                                       | none                                                                                                                                                                                     | none |
| Access to schools                                                       | schools were closed; after re-opening were only small numbers of students accepted; some exceptional opening for HCWs but strong variation                                                                                                  | none                                                                                                                                                                                     | none |
| Social inequalities                                                     | increase in gender inequalities most strongly in vulnerable populations; digitalisation worsens inequalities                                                                                                                                | none                                                                                                                                                                                     | none |

Source: authors' own table, based on expert information and secondary sources

## Key references

- Adams C. (2022). Pregnancy and birth in the United States during the COVID-19 pandemic: The views of doulas. *Birth*, 49(1), 116–122. <https://doi.org/10.1111/birt.12580>
- Ahlers-Schmidt, C.R., Hervey, A.M., Neil, T., Kuhlmann, S., & Kuhlmann, Z. (2020). Concerns of women regarding pregnancy and childbirth during the COVID-19 pandemic. *Patient Education and Counseling*, 103(12), 2578–2582 <https://doi.org/10.1016/j.pec.2020.09.031>
- Aiken A.R.A., Starling, J.E., Gomperts, R., Tec, M., Scott, J.G., & Aiken, C.E. (2020) Demand for self-managed online telemedicine abortion in the United States during the Coronavirus disease 2019 (COVID-19) pandemic. *Obstetrics and Gynecology*, 136(4), 835–837. <https://doi.org/10.1097/AOG.0000000000004081>
- Connor, J., Madhavan, S., Mokashi, M., Amanuel, H., Johnson, N.R., Pace, L.E., & Bartz, D. (2020). Health risks and outcomes that disproportionately affect women during the Covid-19 pandemic: a review. *Social Science & Medicine*, 266, 113364. <https://doi.org/10.1016/j.socscimed.2020.113364>
- Flor, L. S., Friedman, J., Spencer, C.N., Cagney, J., Arrieta, A., Herbert, M.E., Stein, C., Mullany, E., Hon, J., Patwardhan, V., Barber, R.M., Collins, J.K., Hay, S.I., Lim, S.S., Lozano, R., Mokdad, A.H., Murray, C.J.L., Reiner, R.C. Jr., Sorensen, R.J.D., Pigott, D. M., Haakenstad, A., & Gakidou, E. (2022). Quantifying the effects of the COVID-19 pandemic on gender equality on health, social, and economic indicators: a comprehensive review of data from March, 2020, to September, 2021. *The Lancet*, 399, P2381–2397. [https://doi.org/10.1016/S0140-6736\(22\)00008-3](https://doi.org/10.1016/S0140-6736(22)00008-3)
- Gutschow, K., & Davis-Floyd, R. (2021). The impacts of COVID-19 on US maternity care practices: a follow-up study. *Frontiers in Sociology*, 6, 655401. <https://doi.org/10.3389/fsoc.2021.655401>
- Maier, M., Samari G., Ostrowski, J., Bencomo, C., & McGovern, T. (2021). ‘Scrambling to figure out what to do’: a mixed method analysis of COVID-19’s impact on sexual and reproductive health and rights in the United States. *BMJ Sexual & Reproductive Health*, 47(4), e16. <http://dx.doi.org/10.1136/bmjshr-2021-201081>
- Robinson, L.J., Engelson, B.J., & Hayes, S.N. (2021). Who is caring for health care workers' families amid COVID-19? *Academic Medicine: Journal of the Association of American Medical Colleges*, 96(9), 1254–1258. <https://doi.org/10.1097/ACM.0000000000004022>
- Sapire, R., Ostrowski, J., Maier, M., Samari, G., Bencomo, C., & McGovern, T. (2022). COVID-19 and gender-based violence service provision in the United States. *PLoS ONE*, 17(2), e0263970. <https://doi.org/10.1371/journal.pone.0263970>
- Stratton, P., Gorodetsky, E., & Clayton, J. (2021) Pregnant in the United States in the COVID-19 pandemic: a collision of crises we cannot ignore. *Journal of the National Medical Association*, 2021, 113(5), 499–503. <https://doi.org/10.1016/j.jnma.2021.03.008>
- Voth Schrag, R.J., Leat, S., Backes, B, Childress, S., & Wood, L. (2022). ‘So many extra safety layers’: virtual service provision and implementing social distancing in interpersonal violence service agencies during COVID-19. *Journal of Family Violence*, online. <https://doi.org/10.1007/s10896-021-00350-w>
